# Supplementary material
Source: PubMed Central journal article supplement (PMC2710699)
Supplement: 0902657106_0902657106SI.pdf [file 0902657106_0902657106SI.pdf]

# Supporting Information

Deschamps et al. 10.1073/pnas.0902657106

[Movie S1 \(MOV\)](#)

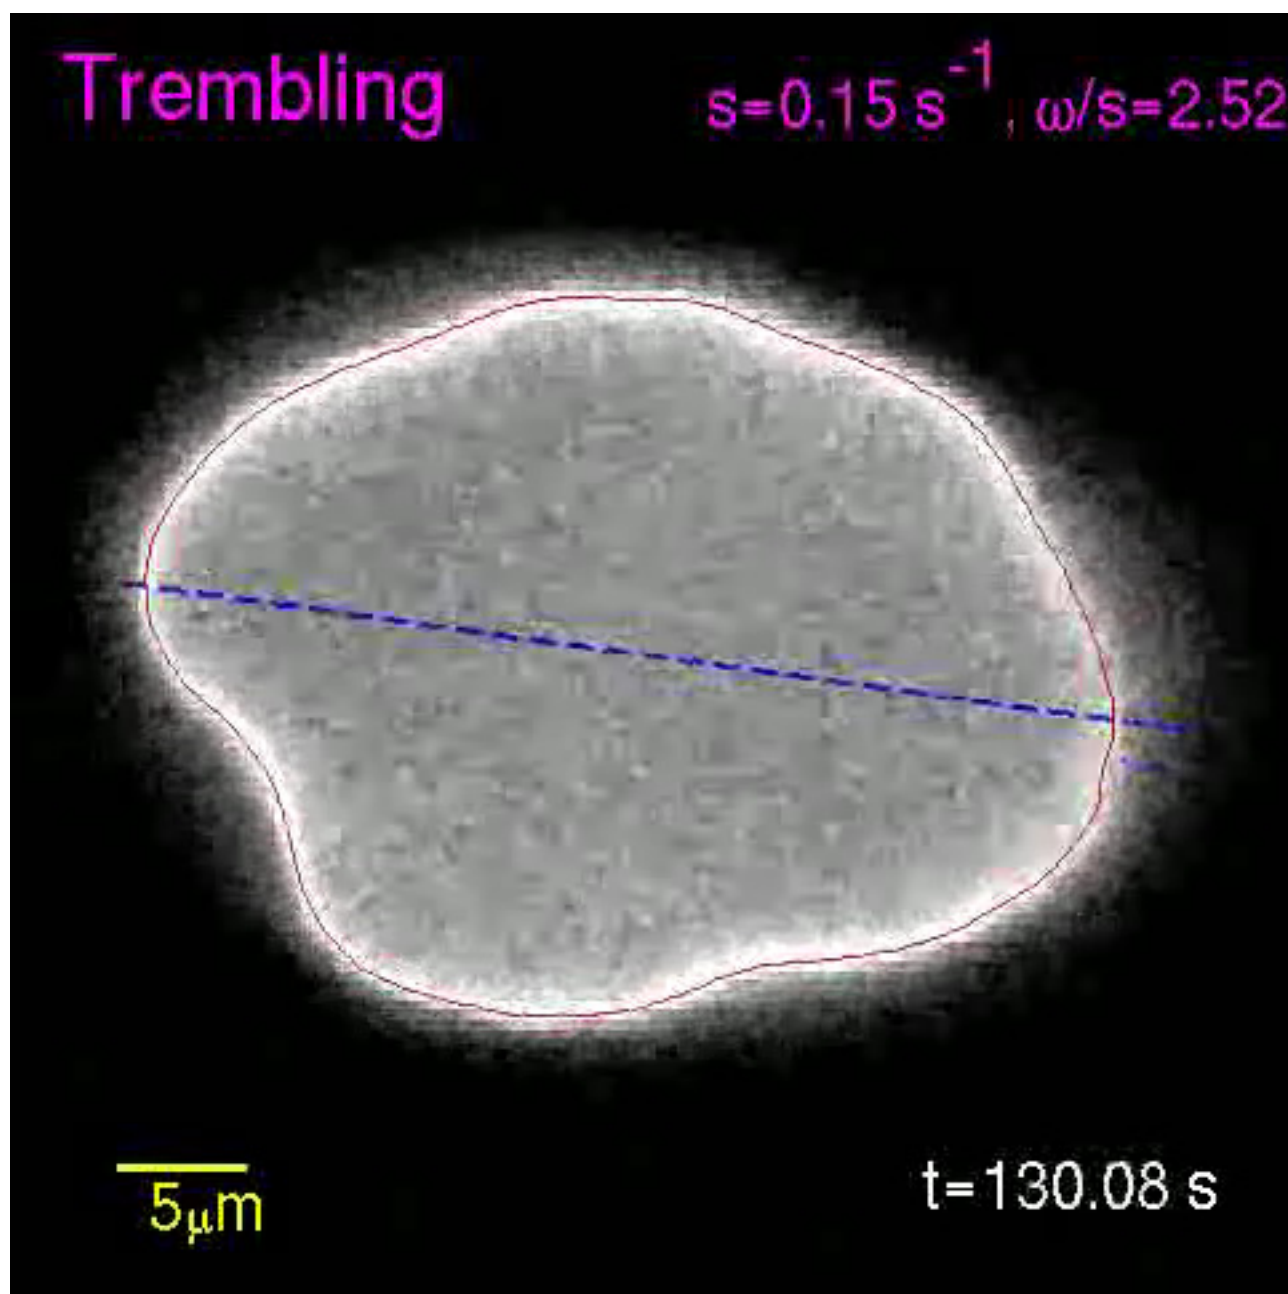

Movie S1. This movie presents 3 regimes of vesicle dynamics when the control parameters changed.

## Other Supporting Information Files

[SI Appendix \(PDF\)](#)
